# Supplementary material
Source: Springer Nature journal article supplement (https://www.springermedizin.de/resource/supplementary/13012_2010_281_MOESM4_ESM.pdf/9629624)

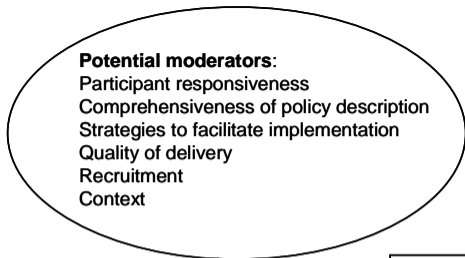

**Intervention**

**Adherence:**

Content  
Coverage  
Frequency  
Duration

**Outcomes**

Evaluation

Evaluation of  
implementation  
fidelity

Component analysis  
to identify  
"essential" components

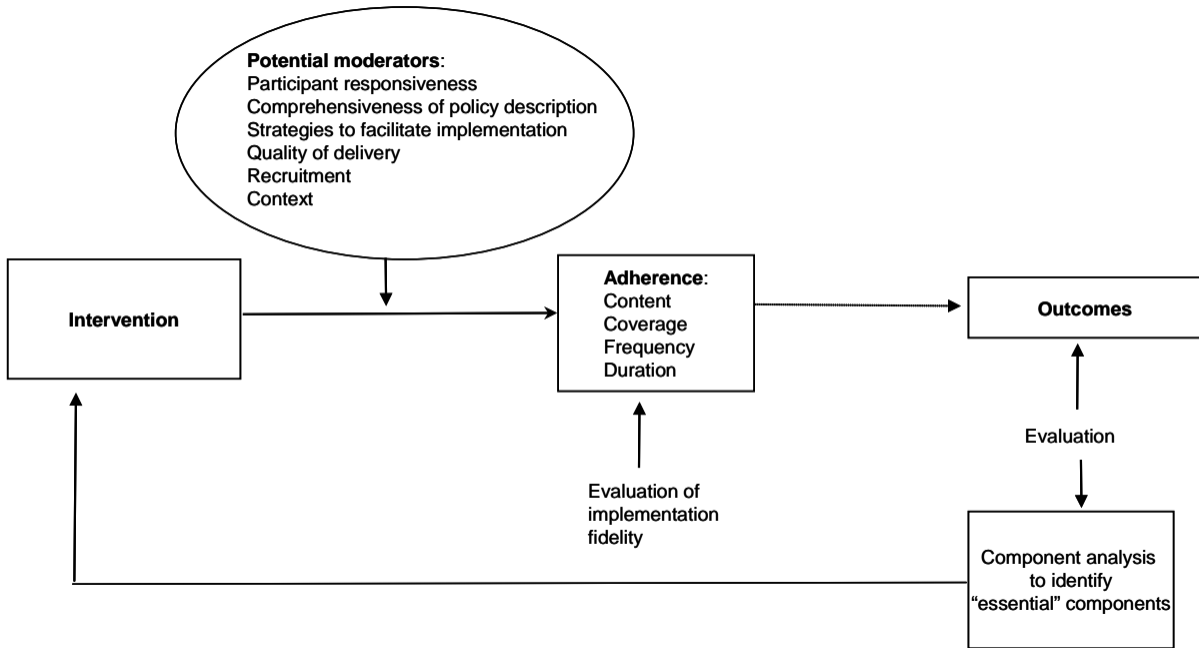

Supplement: MOESM4 [file 9629624]
